# Supplementary material for: Why a diaminopyrrolic tripodal receptor binds mannosides in acetonitrile but not in water?
Source: PubMed Central journal article supplement (PMC4142876; doi:10.3762/bjoc.10.156), 2014-07-03

## **SUPPORTING INFORMATION**

for

# **Why a diaminopyrrolic tripodal receptor binds mannosides in acetonitrile but not in water?**

Diogo Vila-Viçosa<sup>1</sup>, Oscar Francesconi<sup>2</sup> and Miguel Machuqueiro<sup>1\*</sup>

Address: <sup>1</sup>Centro de Química e Bioquímica, Departamento de Química e Bioquímica, Faculdade de Ciências, Universidade de Lisboa, 1749-016 Lisboa, Portugal, Phone: +351-21-7500112. Fax: +351-21-7500088 and <sup>2</sup>Dipartimento di Chimica, Università di Firenze, Polo Scientifico e Tecnologico, 50019 Sesto Fiorentino, Firenze, Italy

Email: Miguel Machuqueiro\* - machuque@fc.ul.pt

\*Corresponding author

Diagrams representing the population of all microstates at all simulated pH values

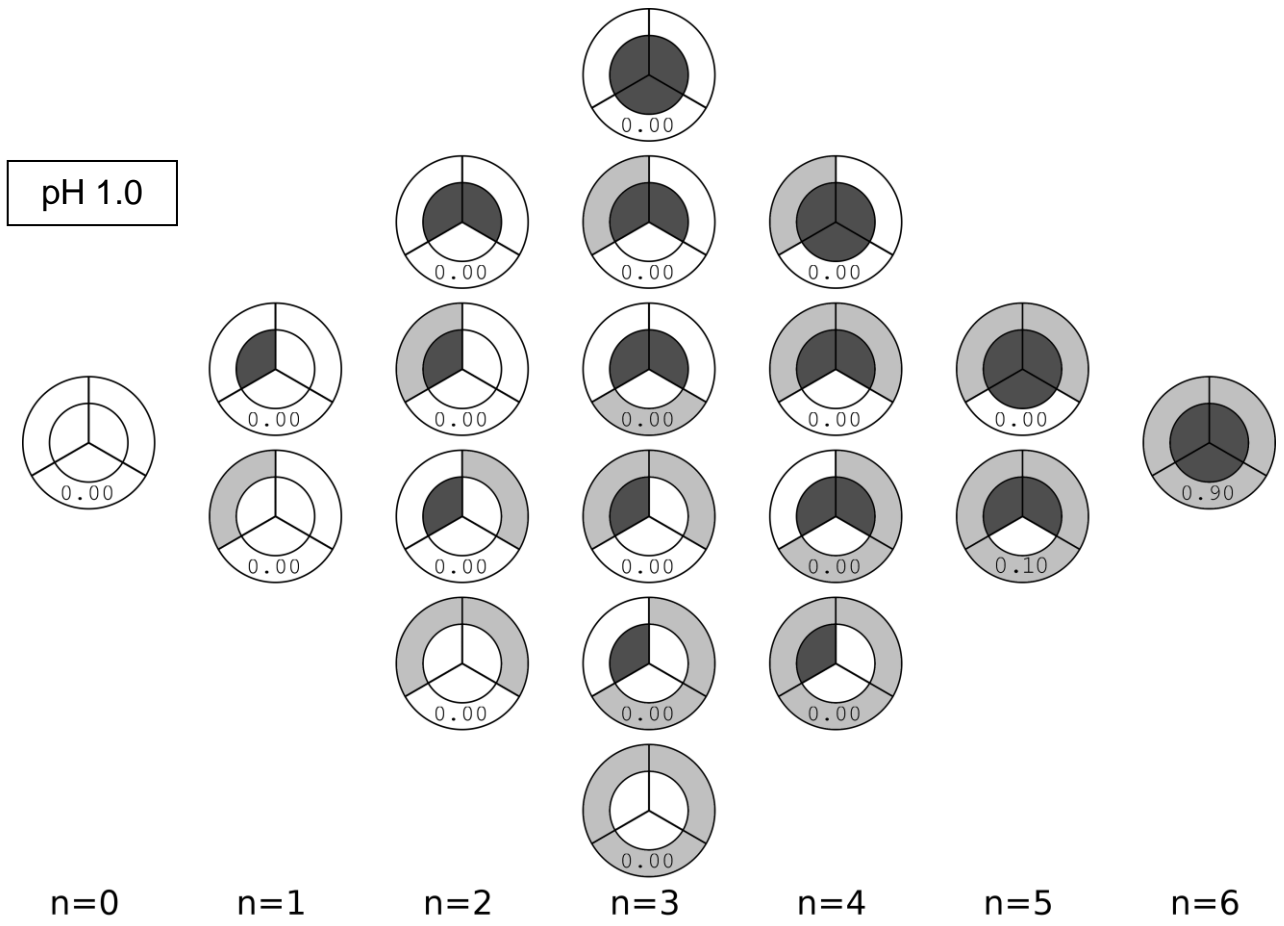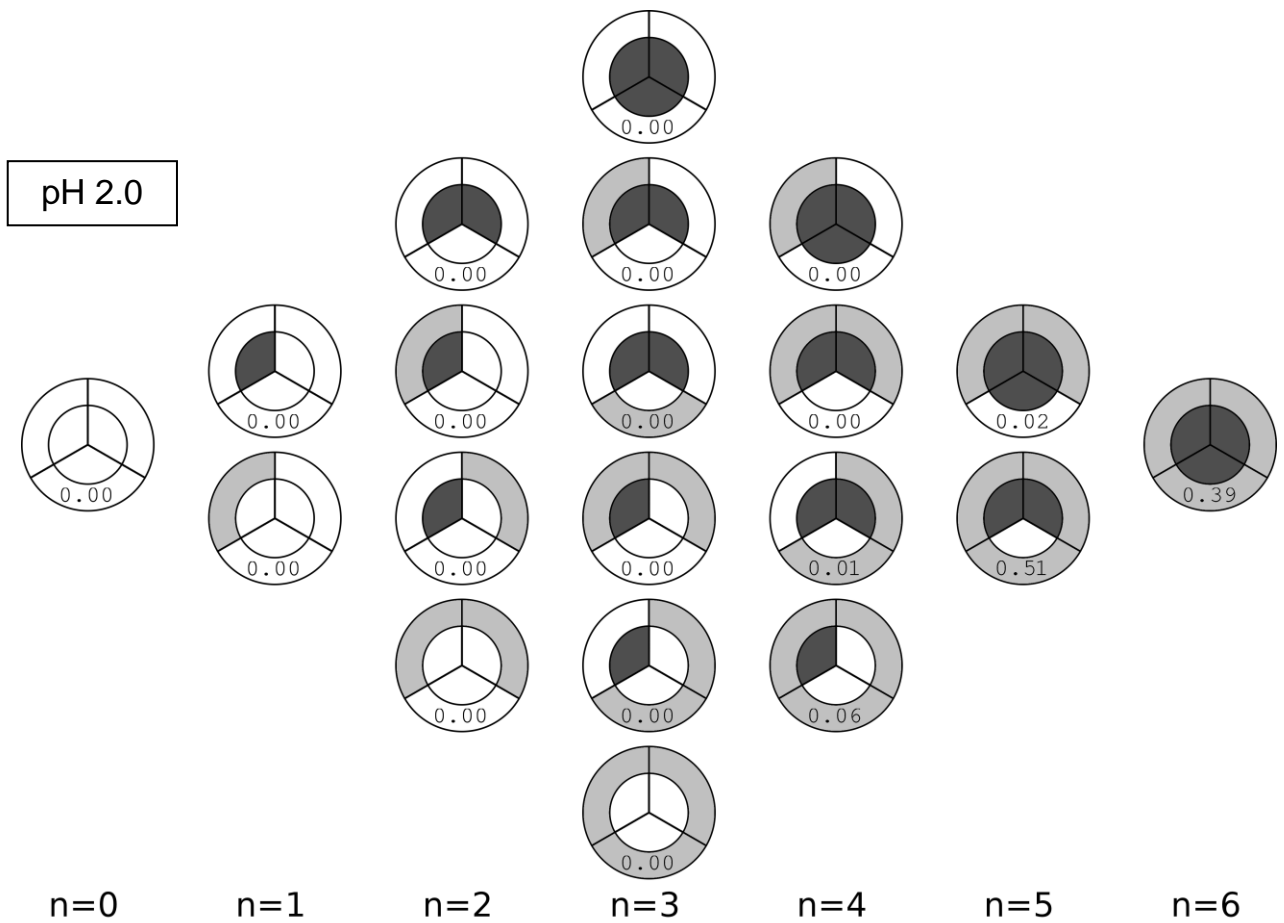

pH 3.0

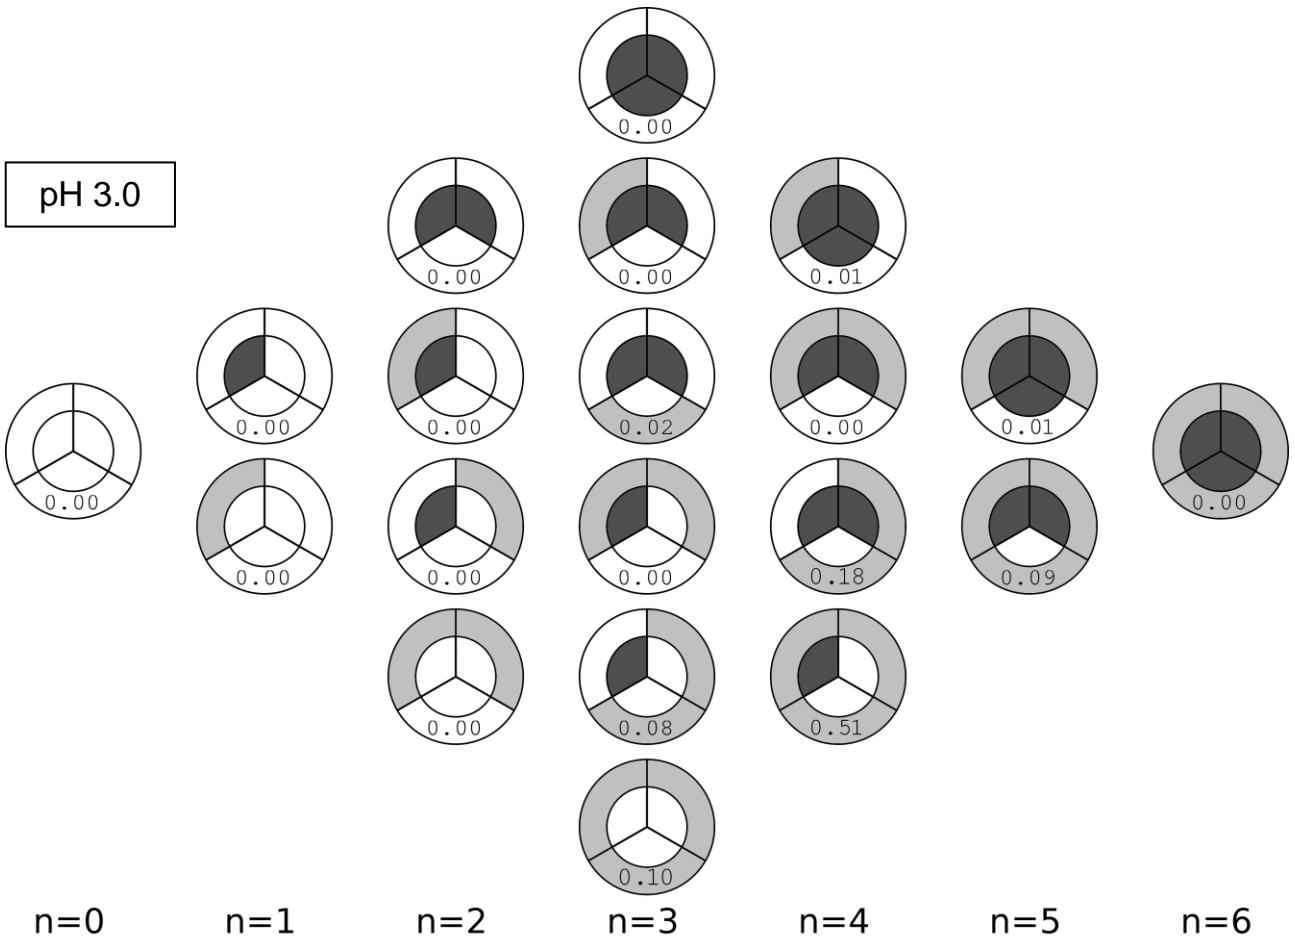

pH 4.0

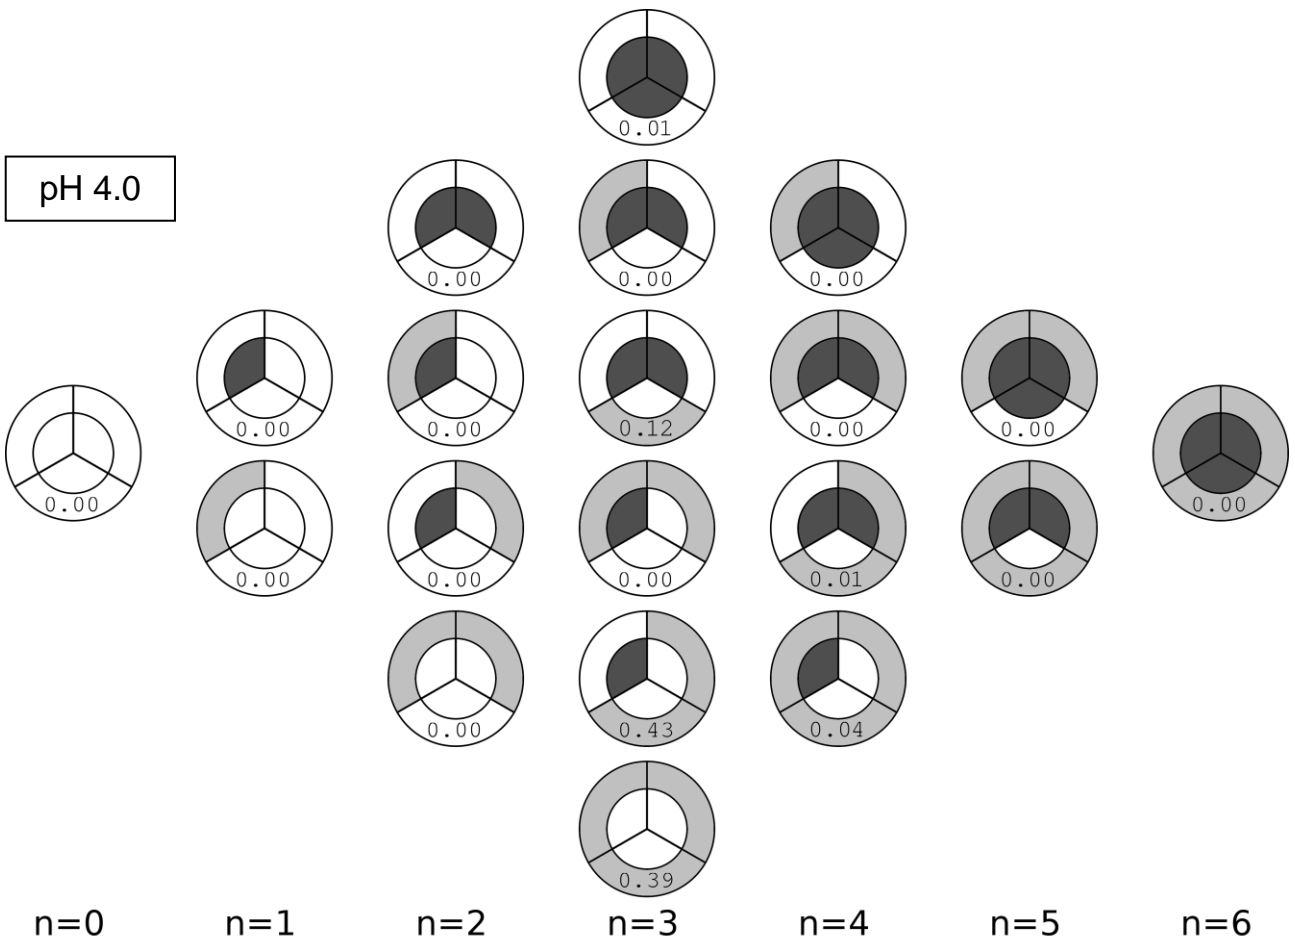

pH 5.0

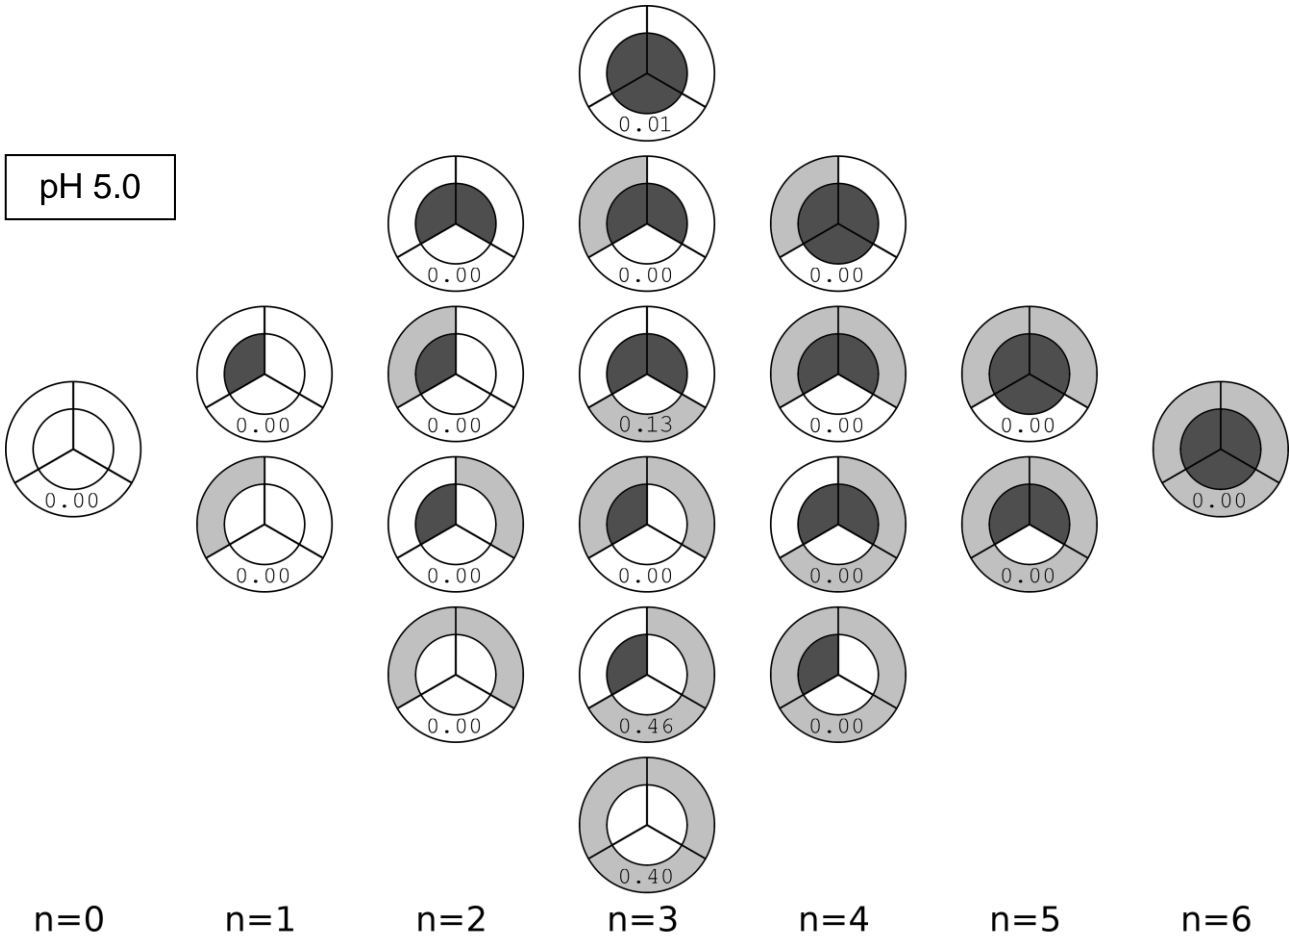

pH 6.0

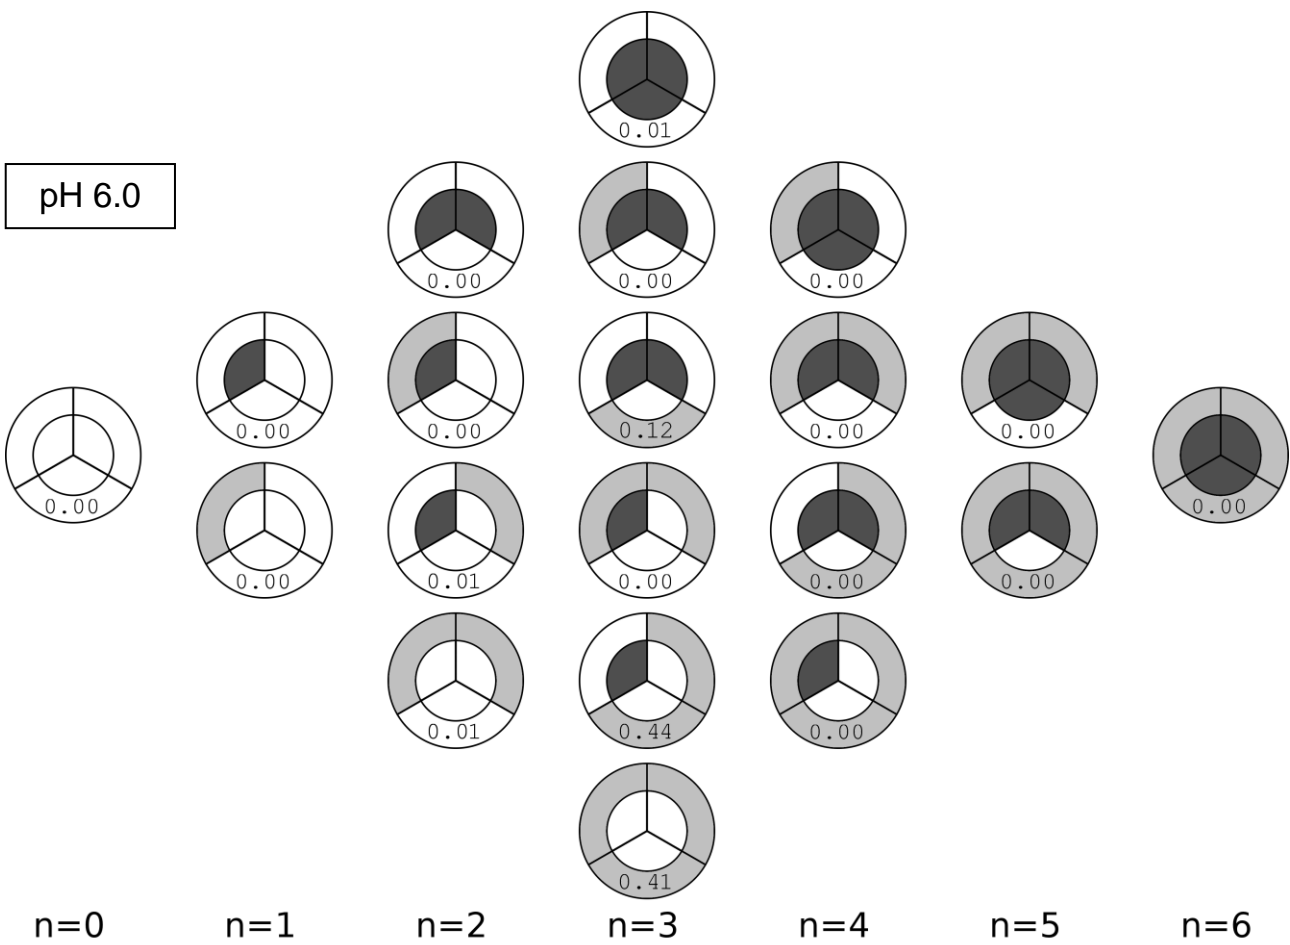

pH 7.0

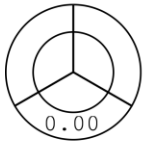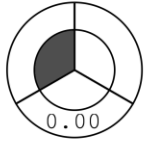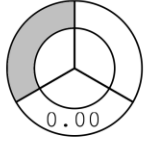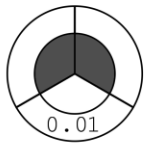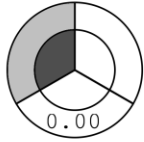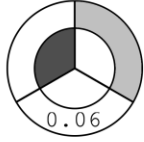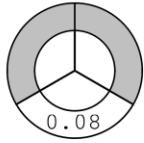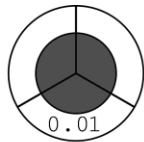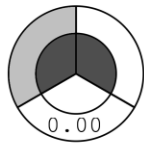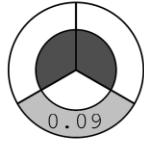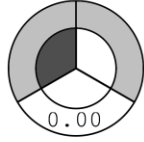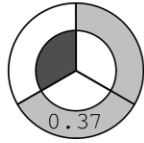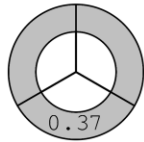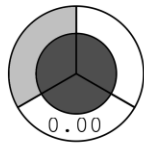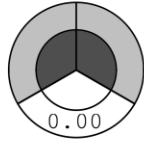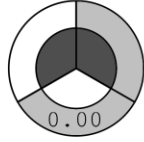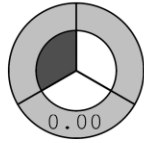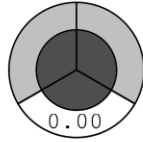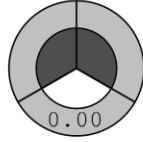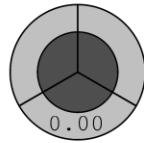

n=0

n=1

n=2

n=3

n=4

n=5

n=6

pH 8.0

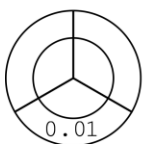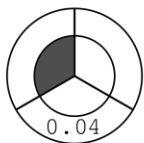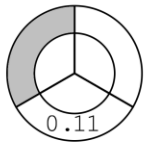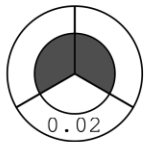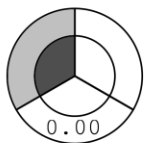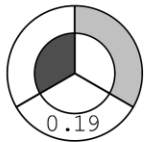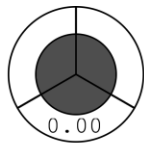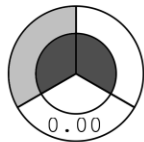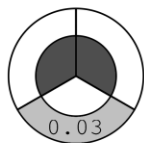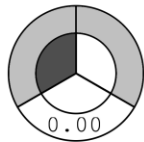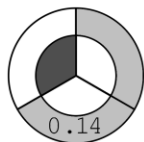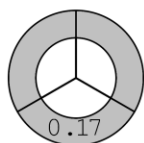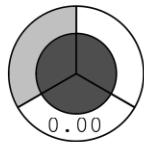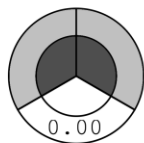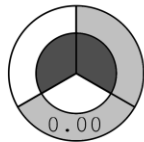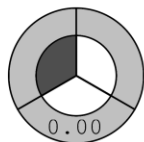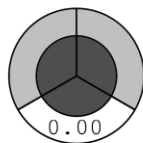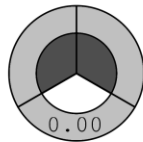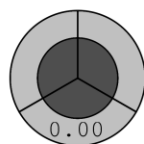

n=0

n=1

n=2

n=3

n=4

n=5

n=6

pH 9.0

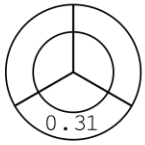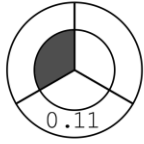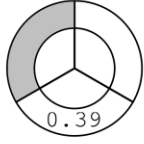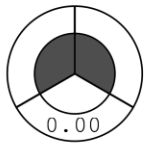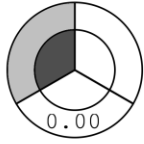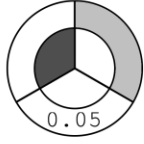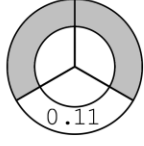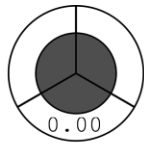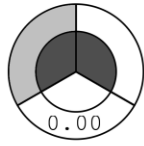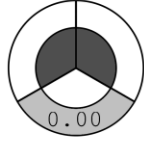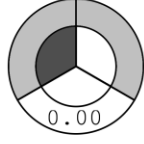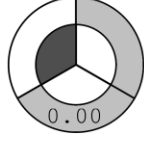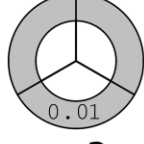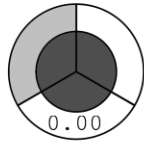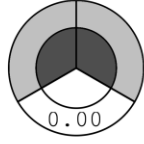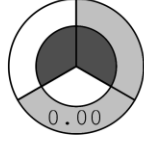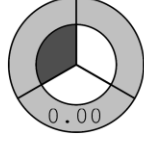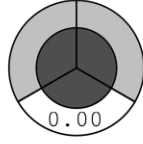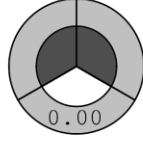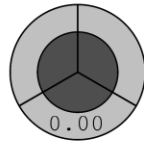

n=0

n=1

n=2

n=3

n=4

n=5

n=6

pH 10.0

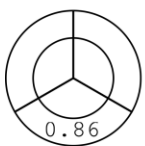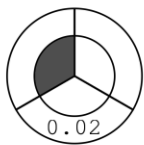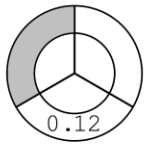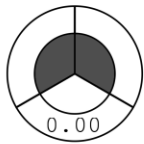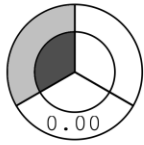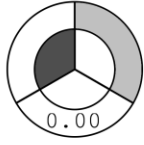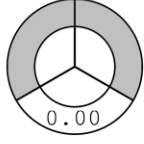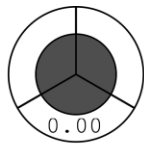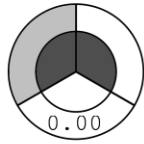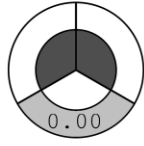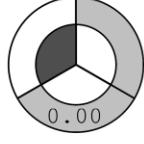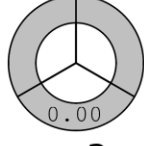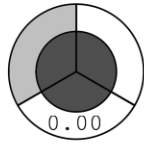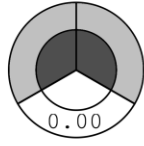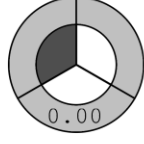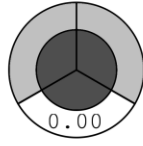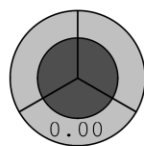

n=0

n=1

n=2

n=3

n=4

n=5

n=6

# Radius of gyration ( $R_g$ ) histograms for the receptor at all simulated pH values and acetonitrile (ACN)

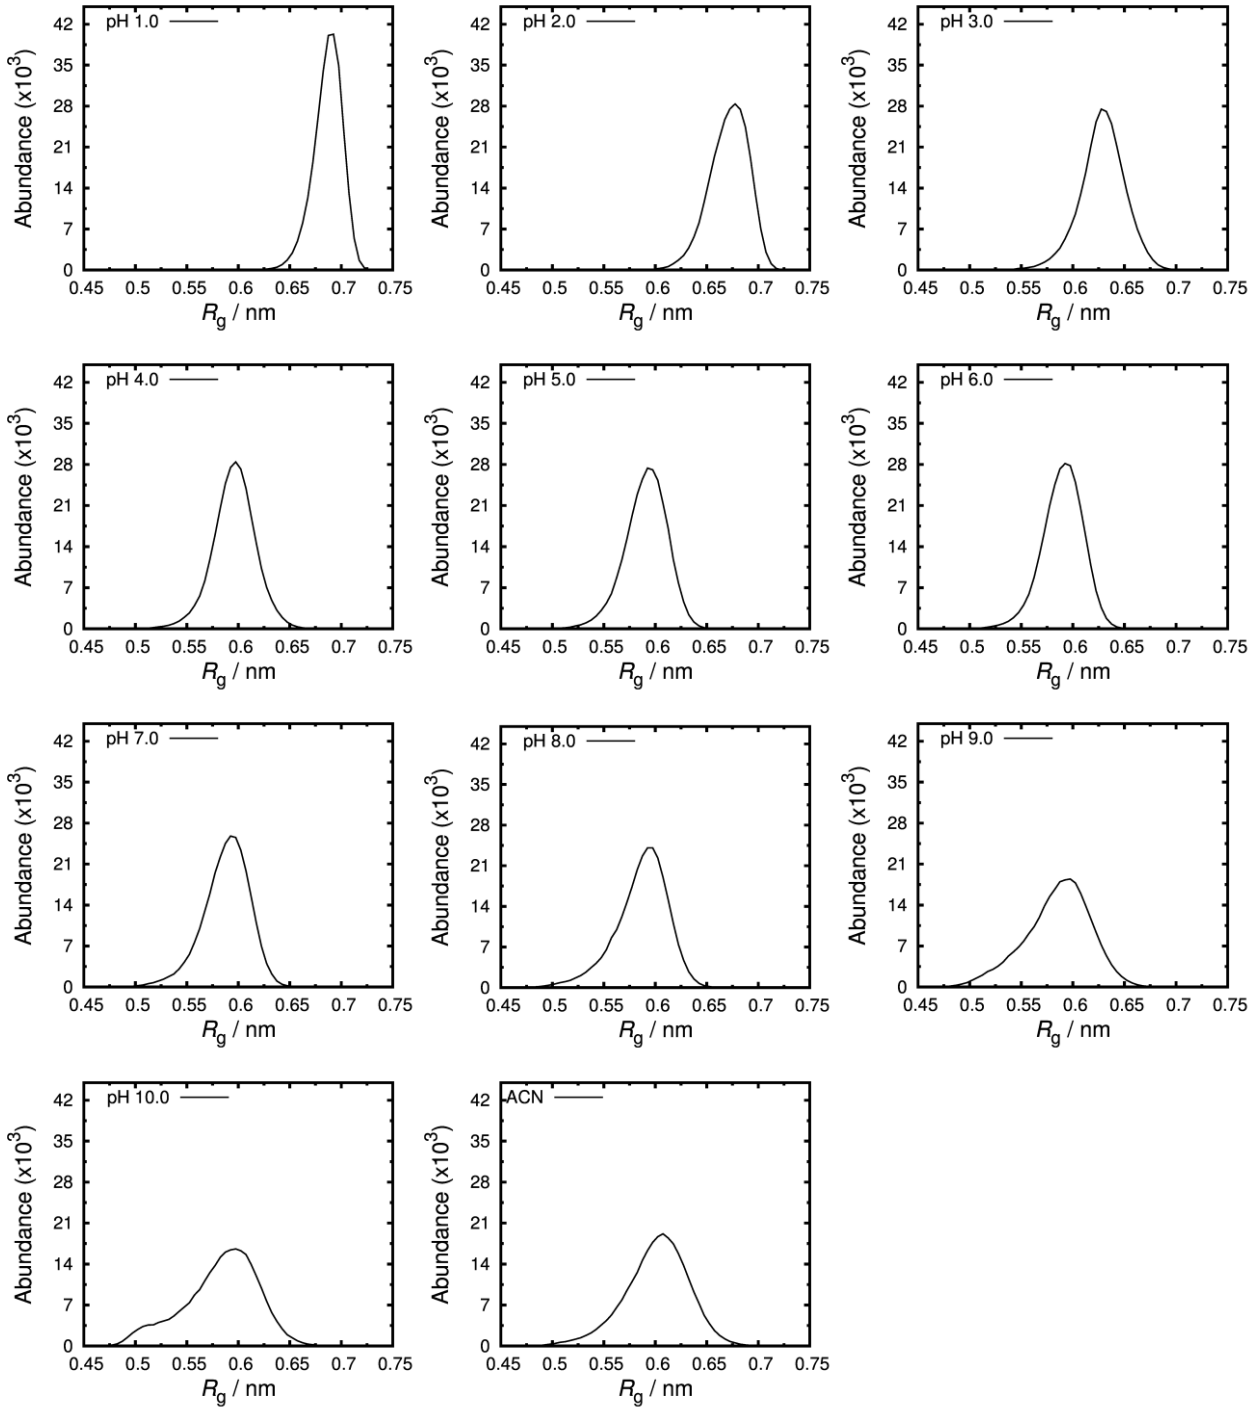

# Free energy profiles for the receptor at all simulated pH values and ACN using RMSD and $R_g$ as structural coordinates

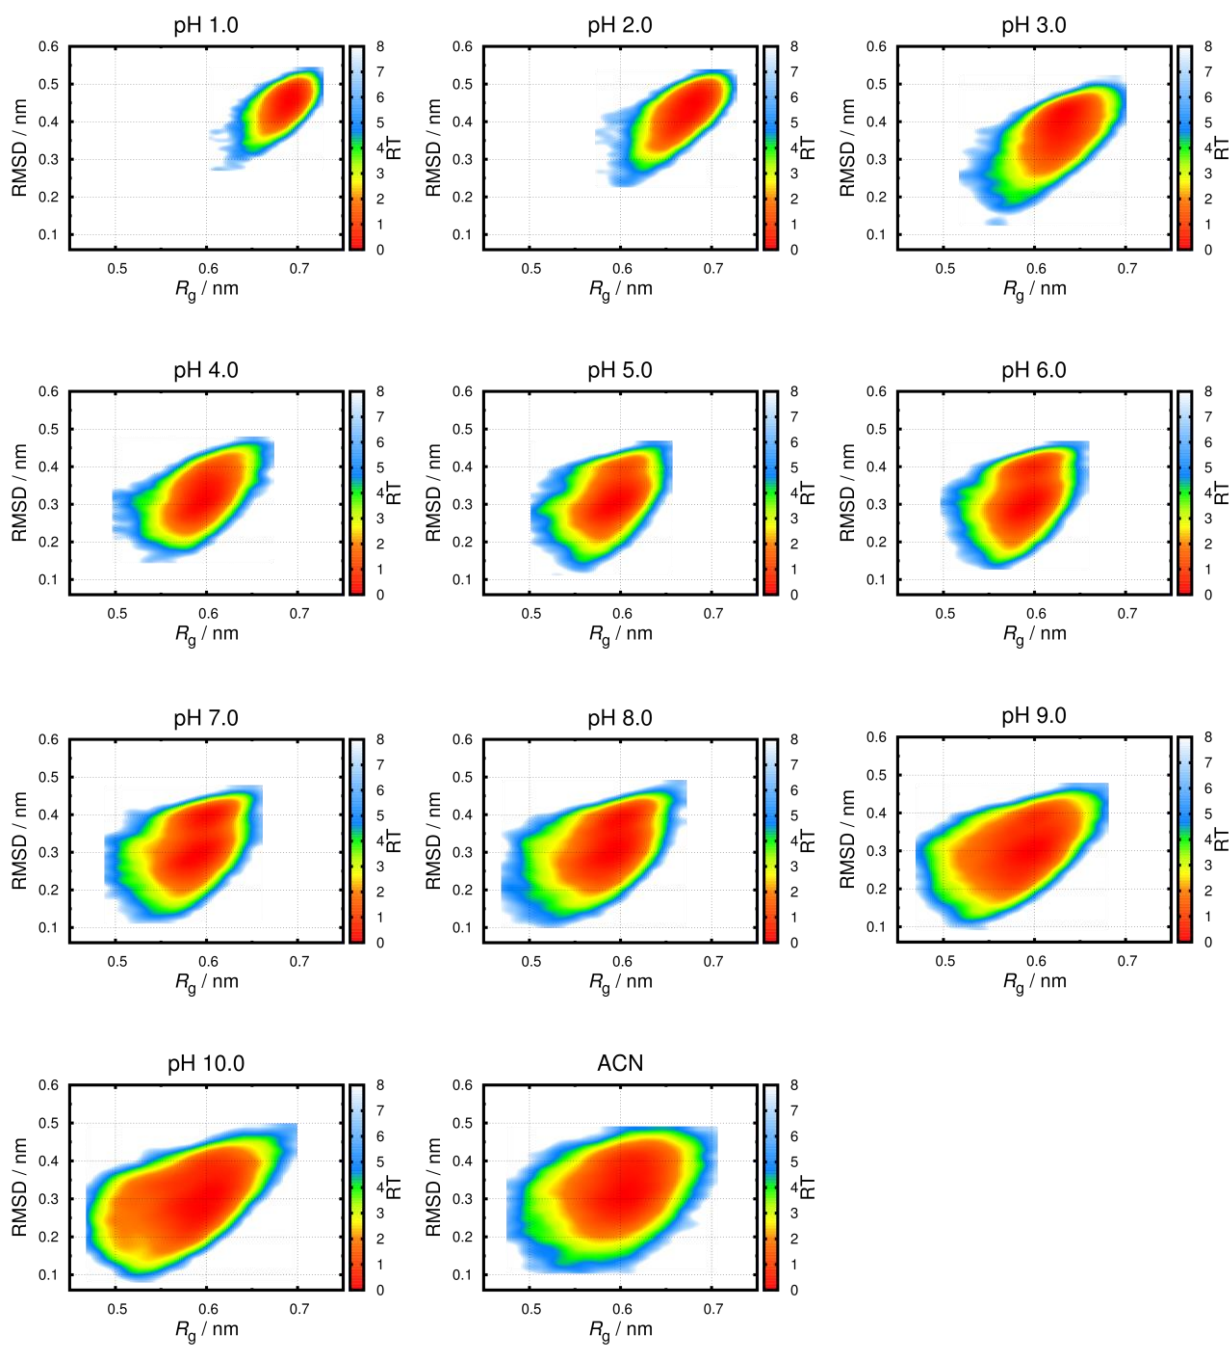



**Schematic representation of the position of the arms of the receptor. Position of nitrogen atoms of the pyrrolic rings relative to the phenyl ring in 900 conformations at all simulated pH values and ACN.**

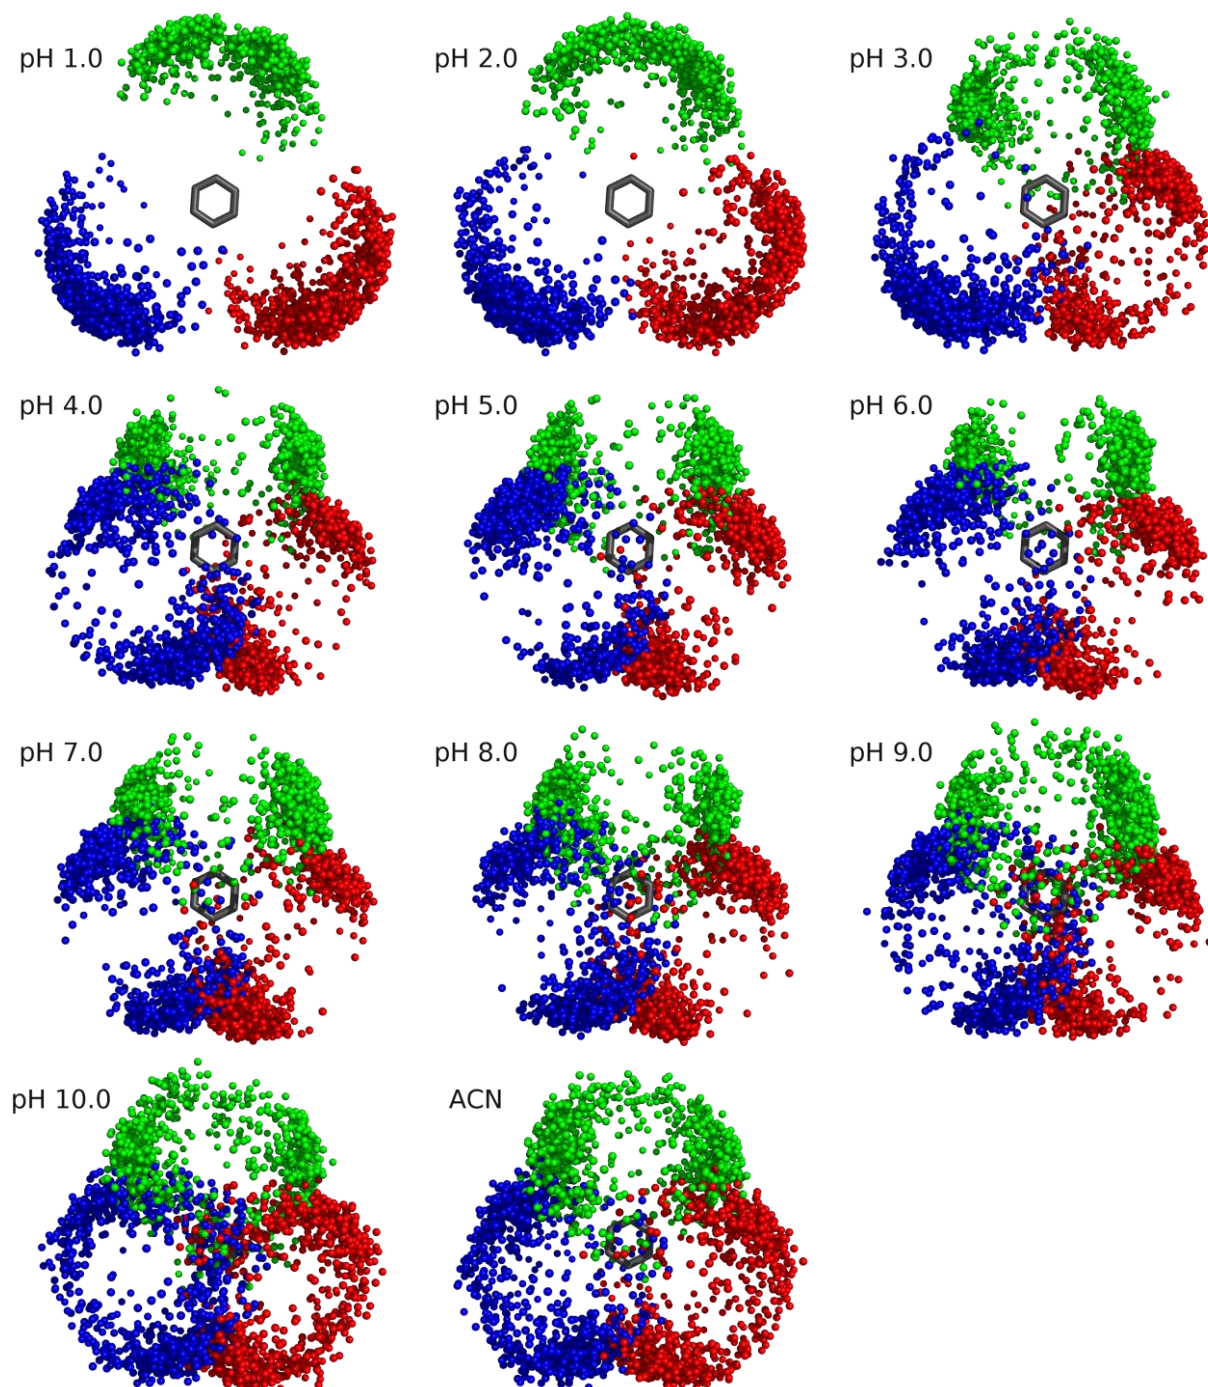

Supplement: Beilstein_J_Org_Chem-10-1513-s001.pdf [file Beilstein_J_Org_Chem-10-1513-s001.pdf]
